# Supplementary material for: Production of bikaverin by a Fusarium fujikuroi mutant in submerged cultures
Source: PubMed Central journal article supplement (PMC4854849; doi:10.1186/s13568-016-0205-0), 2016-05-03
Supplement: 13568_2016_205_MOESM1_ESM.pdf [file 13568_2016_205_MOESM1_ESM.pdf]

**Production of bikaverin by a *Fusarium fujikuroi* mutant in submerged cultures**

G. J. Lale and R.V. Gadre\*

Biochemical and Biological Engineering Group,  
Chemical Engineering and Process Development Division  
CSIR-National Chemical Laboratory  
Pune 411008  
India

\*Correspondence to

Dr. R. V. Gadre, Chemical Engineering and Process Development Division  
National Chemical Laboratory, Pune, 411008, India

E-mail: [rv.gadre@ncl.res.in](mailto:rv.gadre@ncl.res.in)

Telephone: +91 20 25902348

Fax: +91 20 25902612

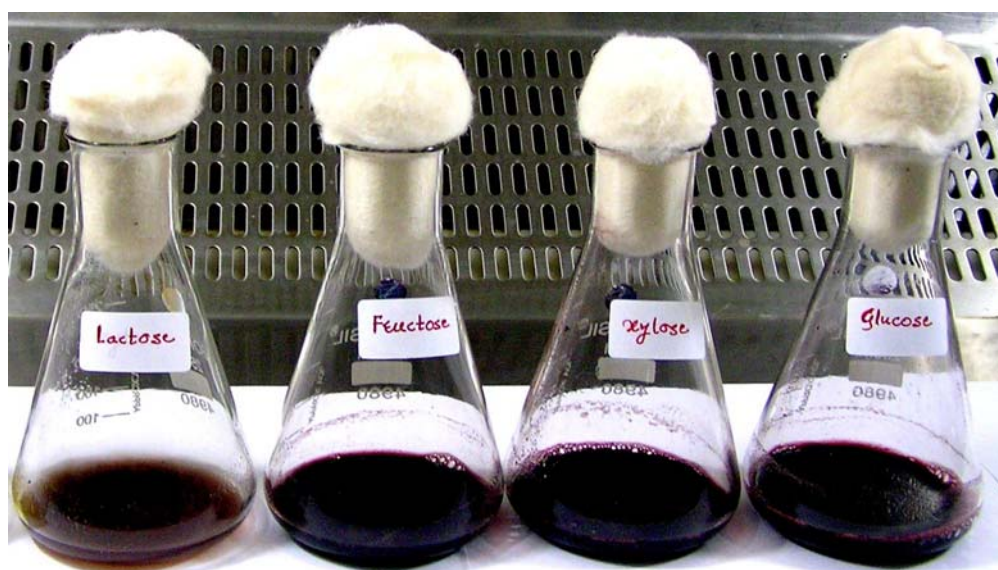

**Figure S1.** Production of bikaverin in shake flasks by *Fusarium fujikuroi* Mut-4 using different carbon sources

*Fusarium fujikuroi* mutant Mut-4 was grown in 50 ml fermentation medium with 2 g l<sup>-1</sup> soybean meal as nitrogen source and lactose, glucose, fructose and xylose as carbon sources at 50 g l<sup>-1</sup> concentration. The flasks were incubated at 28 °C for 120 h, at 200 rpm. The bikaverin production by mutant Mut-4 was very intense in media with glucose, fructose and xylose, while lactose resulted in lower bikaverin production.
